# Supplementary material for: Urinary CD133+ Extracellular Vesicles Are Decreased in Kidney Transplanted Patients with Slow Graft Function and Vascular Damage
Source: PubMed Central journal article supplement (PMC4123993; doi:10.1371/journal.pone.0104490), 2014-08-06
Supplement: pone.0104490.s001.pdf [file pone.0104490.s001.pdf]

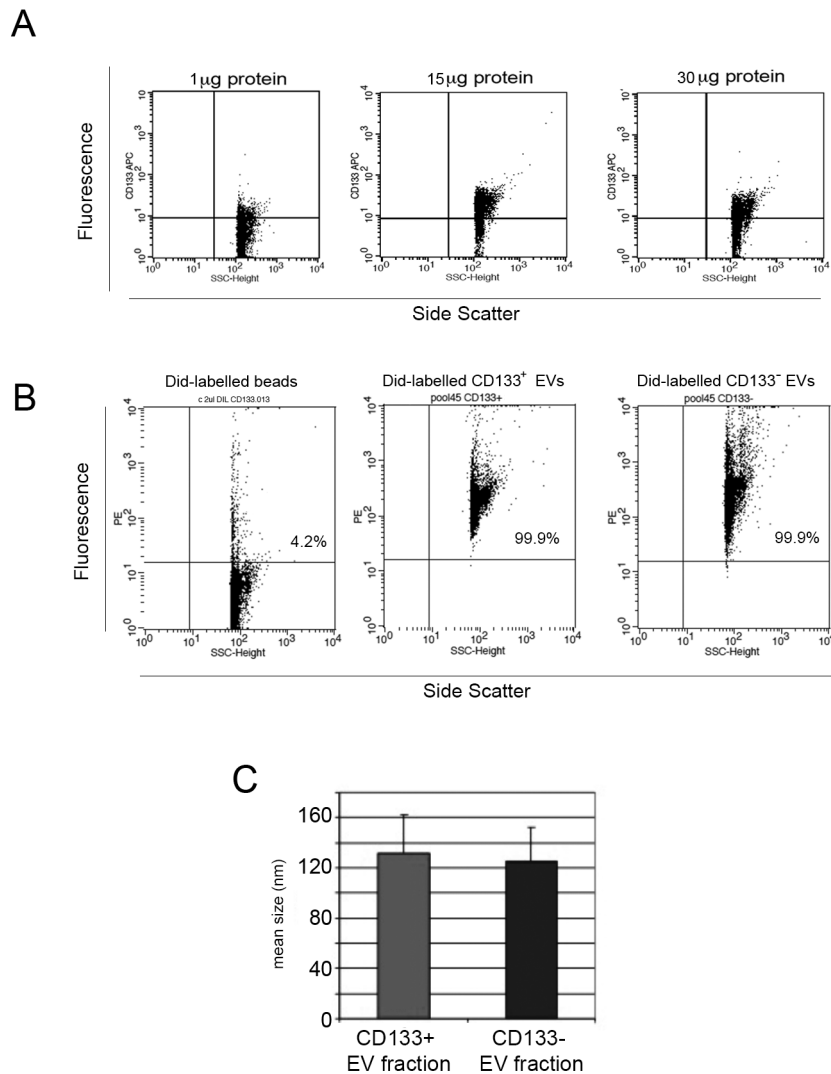

Supplementary Figure 1

**Figure S1. Cytofluorimetric controls of EV dosage and binding onto latex beads. Panel A.** Representative dot plots showing fluorescence detection of CD133 at increasing concentrations of urinary EVs. No increase in signal was obtained after 15  $\mu\text{g}$  protein. **Panel B.** Representative dot plots showing fluorescence detection of EVs labelled with Did-fluorescent dye. No difference in fluorescence was observed between the CD133<sup>+</sup> and the CD133<sup>-</sup> sorted fractions. The first plot

shows labelling of latex beads alone, as control. **Panel C.** NanoSight analysis of EV mean size showing no difference in CD133<sup>+</sup> and the CD133<sup>-</sup> sorted fractions.
